# Supplementary material
Source: PubMed Central journal article supplement (PMC2336866)
Supplement: JCI0833402sd.pdf [file JCI0833402sd.pdf]

**Online Supplementary Table I**

| Patient         | Age | Sex | HLA-A2 | Viral load (IUx10 <sup>6</sup> /ml) | ALT (IU/L) | Serology | cDNA arrayed (purified*) | Bim     |        | Mcl-1 10 day | Rescue (VAD) |        |
|-----------------|-----|-----|--------|-------------------------------------|------------|----------|--------------------------|---------|--------|--------------|--------------|--------|
|                 |     |     |        |                                     |            |          |                          | ex vivo | 10 day |              | ex vivo      | 10 day |
| <b>Resolved</b> |     |     |        |                                     |            |          |                          |         |        |              |              |        |
| R1              | NA  | F   | +      | N                                   | NA         | HBsAg-   | Y*                       | N       | Y      | Y            | N            | Y      |
| R2              | NA  | M   | +      | N                                   | <50        | HBsAg-   | N                        | N       | Y      | Y            | N            | Y      |
| R3              | 50  | M   | +      | N                                   | NA         | HBsAg-   | N                        | N       | N      | N            | N            | Y      |
| R4              | 41  | NA  | +      | N                                   | NA         | HBsAg-   | Y                        | N       | Y      | Y            | N            | Y      |
| R5              | 32  | M   | +      | N                                   | 10         | HBsAg-   | N                        | N       | Y      | Y            | N            | Y      |
| R6              | 38  | M   | +      | N                                   | <50        | HBsAg-   | Y                        | N       | Y      | Y            | N            | Y      |
| R7              | 26  | M   | +      | N                                   | 32         | HBsAg-   | N                        | Y       | Y      | Y            | N            | N      |
| R8              | 35  | M   | +      | N                                   | <50        | HBsAg-   | N                        | N       | Y      | Y            | N            | N      |
| R9              | 39  | M   | +      | N                                   | 74         | HBsAg-   | N                        | N       | Y      | Y            | N            | N      |
| R10             | NA  | F   | +      | N                                   | NA         | HBsAg-   | Y*                       | N       | N      | N            | N            | N      |
| R11             | NA  | M   | +      | N                                   | NA         | HBsAg-   | Y                        | N       | N      | N            | N            | N      |
| R12             | NA  | F   | +      | N                                   | NA         | HBsAg-   | Y                        | N       | Y      | Y            | N            | N      |
| R13             | 42  | M   | +      | N                                   | 17         | HBsAg-   | N                        | Y       | N      | N            | N            | N      |
| R14             | 69  | M   | +      | N                                   | NA         | HBsAg-   | Y                        | N       | N      | N            | N            | N      |
| R15             | 49  | M   | +      | N                                   | NA         | HBsAg-   | Y                        | N       | N      | N            | N            | N      |
| R16             | 64  | M   | +      | N                                   | NA         | HBsAg-   | Y                        | N       | N      | N            | N            | N      |
| R17             | 24  | M   | +      | N                                   | <50        | HBeAg-   | N                        | Y       | N      | N            | N            | N      |
| R18             | NA  | NA  | -      | N                                   | 15         | HBeAg-   | N                        | Y       | N      | N            | N            | N      |
| R19             | 31  | M   | -      | N                                   | 31         | HBeAg-   | N                        | Y       | N      | N            | N            | N      |
| <b>Chronic</b>  |     |     |        |                                     |            |          |                          |         |        |              |              |        |
| C1              | 25  | M   | +      | 0.42                                | 270        | HBeAg+   | N                        | N       | Y      | Y            | N            | Y      |
| C2              | 49  | F   | +      | 1.1                                 | 151        | HBeAg-   | N                        | N       | Y      | Y            | N            | Y      |
| C3              | 31  | M   | +      | 0.00018                             | 92         | HBeAg-   | N                        | N       | Y      | Y            | N            | N      |
| C4              | 29  | F   | +      | 0.0011                              | NA         | HBeAg-   | N                        | N       | Y      | N            | N            | N      |
| C5              | 38  | M   | +      | 510                                 | 206        | HBeAg+   | N                        | N       | Y      | Y            | N            | Y      |
| C6              | 28  | F   | +      | 7.9                                 | 261        | HBeAg+   | N                        | N       | Y      | Y            | N            | Y      |
| C7              | 50  | F   | +      | 0.22                                | 63         | HBeAg-   | N                        | N       | Y      | Y            | N            | Y      |
| C8              | NA  | M   | +      | >10                                 | <50        | HBeAg+   | N                        | Y       | N      | N            | Y            | Y      |
| C9              | NA  | M   | +      | >10                                 | <50        | HBeAg+   | Y*                       | N       | N      | N            | N            | Y      |
| C10             | NA  | M   | +      | 0.00057                             | <50        | HBeAg-   | N                        | N       | N      | N            | N            | Y      |
| C11             | 44  | M   | +      | 0.065                               | 49         | HBeAg-   | N                        | Y       | N      | N            | Y            | Y      |
| C12             | 43  | M   | +      | 33                                  | 250        | HBeAg+   | N                        | N       | N      | N            | N            | Y      |
| C13             | 31  | M   | +      | 0.0045                              | NA         | HBeAg-   | N                        | N       | Y      | Y            | N            | Y      |
| C14             | 45  | M   | +      | BLQ                                 | 25         | HBeAg-   | N                        | Y       | N      | N            | N            | N      |
| C15             | 35  | M   | +      | 220                                 | 42         | HBeAg+   | N                        | Y       | Y      | Y            | Y            | N      |
| C16             | 31  | M   | +      | >10                                 | <50        | HBeAg+   | Y                        | Y       | N      | N            | Y            | N      |
| C17             | 42  | F   | +      | NA                                  | 17         | HBeAg-   | N                        | N       | Y      | Y            | N            | N      |
| C18             | 45  | M   | +      | 110                                 | 32         | HBeAg-   | N                        | N       | Y      | Y            | N            | N      |
| C19             | 71  | M   | +      | 2,900                               | 22         | HBeAg-   | N                        | N       | Y      | Y            | N            | N      |
| C20             | 30  | F   | +      | 770                                 | 31         | HBeAg-   | N                        | N       | Y      | Y            | N            | N      |
| C21             | 33  | F   | +      | BLQ                                 | 17         | HBeAg-   | N                        | N       | Y      | Y            | N            | N      |
| C22             | NA  | M   | +      | >10                                 | NA         | HBeAg+   | Y                        | N       | N      | N            | N            | N      |
| C23             | 31  | M   | -      | 330                                 | 39         | HBeAg+   | N                        | N       | N      | N            | N            | N      |
| C24             | 35  | F   | -      | 260                                 | 554        | HBeAg+   | N                        | Y       | N      | N            | N            | N      |
| C25             | 42  | M   | -      | 95                                  | 183        | HBeAg+   | N                        | Y       | N      | N            | N            | N      |

NA= not available; N= negative

**Online Supplementary Table II**  
**Significance analysis of Microarrays shortlist**

**76 positive significant genes**

| <b>Gene Name</b>                                   | <b>Unigene ID (Hs.) *</b> | <b>Score(d)</b> | <b>Fold Change</b> |
|----------------------------------------------------|---------------------------|-----------------|--------------------|
| <i>Bcl-2 interacting mediator</i>                  | 140648                    | 5.20            | 6.63               |
| EST                                                | 330442                    | 4.97            | 4.81               |
| Complement component 3                             | 1203320                   | 4.96            | 5.81               |
| Complement component 3                             | 1203320                   | 4.64            | 5.08               |
| Secreted frizzled-related protein 1                | 7306                      | 4.54            | 3.75               |
| N-acetylglucosaminidase, alpha                     | 50727                     | 4.37            | 4.09               |
| Myelin associated glycoprotein                     | 1780                      | 4.32            | 8.56               |
| Insulin-like growth factor binding protein         | 77326                     | 4.23            | 9.25               |
| Extracellular matrix protein 2                     | 35094                     | 4.09            | 3.08               |
| Coiled-coil domain containing 52                   | 477144                    | 4.02            | 4.42               |
| Growth arrest & DNA-damage-inducible, gamma        | 9701                      | 3.91            | 4.15               |
| Contactin                                          | 143434                    | 3.91            | 2.79               |
| Frizzled homolog 2                                 | 81217                     | 3.90            | 2.86               |
| Serine (or cysteine) proteinase inhibitor, clade A | 297681                    | 3.84            | 3.74               |
| Cytochrome c oxidase subunit Va                    | 434076                    | 3.80            | 3.68               |
| Ki-ras                                             | ND                        | 3.77            | 3.57               |
| Dystrobrevin, alpha                                | 336678                    | 3.76            | 2.23               |
| Integrin, alpha 6                                  | 227730                    | 3.72            | 4.22               |
| Procollagen (type III) N-endopeptidase             | 183138                    | 3.70            | 2.69               |
| Ribosomal protein S4, Y-linked                     | 180911                    | 3.62            | 3.48               |
| Matrix metalloproteinase 17                        | 159581                    | 3.62            | 4.28               |
| Forkhead box G1B                                   | 386249                    | 3.60            | 3.32               |
| Matrix metalloproteinase 13                        | 2936                      | 3.57            | 2.98               |
| Connective tissue growth factor                    | 75511                     | 3.52            | 7.34               |
| <i>Cathepsin B</i>                                 | 297939                    | 3.50            | 3.33               |
| Profilin 1                                         | 75721                     | 3.49            | 4.12               |
| Chloride channel 4                                 | 199250                    | 3.47            | 2.77               |
| <i>Suppressor of cytokine signalling</i>           | 405946                    | 3.47            | 4.51               |
| Uracil-DNA glycosylase                             | 78853                     | 3.45            | 2.49               |
| Pyrroline-5-carboxylate reductase 1                | 79217                     | 3.45            | 3.50               |
| Gamma-aminobutyric acid (GABA) A receptor          | 45740                     | 3.44            | 3.40               |
| STAT6                                              | ND                        | 3.42            | 2.84               |
| Cut-like 1, CCAAT displacement protein             | 147049                    | 3.41            | 2.74               |
| <i>OX-40</i>                                       | 129780                    | 3.40            | 3.00               |
| Rho GTPase-activating protein                      | 111138                    | 3.37            | 4.11               |
| Lysophosphatidic acid G-protein-coupled R.2        | 75794                     | 3.37            | 3.31               |
| Tryptase beta 1                                    | 405479                    | 3.36            | 3.09               |
| Apolipoprotein A-I                                 | 93194                     | 3.35            | 7.50               |
| <i>Mitogen-activating protein kinases 4 2</i>      | 82979                     | 3.34            | 3.34               |
| Catenin (cadherin-associated protein)              | 80220                     | 3.34            | 3.30               |
| Acyl-Coenzyme A oxidase 3, pristanoyl              | 12773                     | 3.33            | 3.39               |
| Folate receptor 2                                  | 24194                     | 3.32            | 2.94               |
| DNA (cytosine-5-)-methyltransferase 1              | 202672                    | 3.31            | 4.62               |
| Glycine receptor, beta                             | 32973                     | 3.31            | 4.68               |
| EST                                                | (N55083)                  | 3.31            | 3.13               |
| Gap junction protein, beta 1                       | 333303                    | 3.29            | 3.80               |

|                                              |            |      |      |
|----------------------------------------------|------------|------|------|
| EST                                          | (R59352)   | 3.28 | 2.67 |
| EST                                          | (R37350)   | 3.27 | 3.11 |
| Amyloid B (A4) precursor protein-binding m.3 | 17528      | 3.26 | 3.87 |
| Human insulin-like growth factor binding     | 635441     | 3.26 | 6.13 |
| Cysteine-rich, angiogenic inducer, 61        | 8867       | 3.25 | 4.89 |
| Transcription factor 21                      | 78061      | 3.25 | 3.13 |
| Hypothetical protein LOC27351                | 570455     | 3.23 | 4.16 |
| Chromosome X open reading frame 12           | 23119      | 3.22 | 3.03 |
| Ribosomal protein S4, Y linked               | 180911     | 3.22 | 3.08 |
| Ras homolog gene family, member E            | 6838       | 3.21 | 3.52 |
| Frizzled homolog 4                           | 19545      | 3.19 | 3.80 |
| Hypothetical protein LOC138046 isoform 1     | 121663     | 3.18 | 2.33 |
| Transcription factor AP-2 beta               | 33102      | 3.17 | 3.33 |
| MET                                          | ND         | 3.16 | 3.31 |
| Fibroblast growth factor 2                   | 284244     | 3.15 | 4.01 |
| Suppressor of cytokine signaling 1           | 50640      | 3.15 | 3.45 |
| EST                                          | (AI356286) | 3.13 | 3.04 |
| Baculoviral IAP repeat-containing 3          | 127799     | 3.13 | 4.51 |
| Palmitoyl-protein thioesterase 2             | 81737      | 3.12 | 3.75 |
| Lactotransferrin                             | 105938     | 3.12 | 2.92 |
| Angiopoetin 1                                | ND         | 3.12 | 3.14 |
| Acyl-Coenzyme A oxidase 3, pristanoyl        | 12773      | 3.11 | 3.32 |
| Telomerase-associated protein 1              | 232070     | 3.11 | 3.47 |
| Rho/Rac guanine nucleotide exchange factor 2 | 337774     | 3.11 | 3.27 |
| Secreted frizzled-related protein 1          | 7306       | 3.11 | 2.49 |
| D component of complement (adipsin)          | 155597     | 3.11 | 2.27 |
| OX-40                                        | 129780     | 3.09 | 3.00 |
| Solute carrier family 3                      | 239106     | 3.09 | 4.24 |
| EST                                          | (R53362)   | 3.09 | 2.30 |
| EST                                          | (R32170)   | 3.09 | 3.15 |

ND = not defined; EST = expressed sequence tag; \* (Genebank ID provided where Unigene ID unavailable)

## 29 negative significant genes

| Gene Name                                     | Unigene ID | Score(d) | Fold Change |
|-----------------------------------------------|------------|----------|-------------|
| Diacylglycerol O-acyltransferase homolog 1    | 288627     | -4.44    | 0.33        |
| GTP-binding protein Rho7                      | 603111     | -4.39    | 0.29        |
| Interferon, gamma                             | 856        | -4.12    | 0.16        |
| Sjogren's syndrome nuclear autoantigen 1      | 18528      | -3.95    | 0.43        |
| Zinc finger RNA binding protein               | 173518     | -3.80    | 0.32        |
| E2F transcription factor 1                    | 96055      | -3.77    | 0.30        |
| Huntingtin interacting protein                | 107019     | -3.74    | 0.45        |
| Human D9 splice variant B mRNA, complete      | 37616      | -3.71    | 0.35        |
| Flightless I homolog                          | 83849      | -3.70    | 0.40        |
| Hypothetical protein MGC14480                 | 37616      | -3.69    | 0.37        |
| Hypothetical protein FLJ10432                 | 143187     | -3.69    | 0.37        |
| Fibroblast growth factor i.c. binding protein | 7768       | -3.63    | 0.46        |
| Phosphomevalonate kinase                      | 30954      | -3.62    | 0.42        |
| Growth arrest & DNA-damage-inducible, alpha   | 80409      | -3.59    | 0.38        |
| Integrin beta 3 binding protein               | 82084      | -3.58    | 0.40        |
| Flightless I homolog                          | 83849      | -3.57    | 0.37        |
| ATP-binding cassette, sub-family F            | 153612     | -3.55    | 0.52        |
| Vestigial like 1                              | 9030       | -3.55    | 0.50        |
| CD37 antigen                                  | 153053     | -3.54    | 0.27        |
| Glycine dehydrogenase                         | 380791     | -3.52    | 0.27        |
| Phosphorylase kinase, gamma 2                 | 196177     | -3.49    | 0.39        |
| SET domain containing 1A                      | 297483     | -3.46    | 0.30        |
| Hypothetical protein XP_375359                | 97805      | -3.43    | 0.36        |
| Hypothetical protein MGC5356                  | 197755     | -3.43    | 0.35        |
| Postreplication repair protein hRAD18p        | 21320      | -3.42    | 0.33        |
| KIAA0368 protein                              | 3852       | -3.40    | 0.45        |
| Phosphorylase, glycogen                       | 75658      | -3.40    | 0.38        |
| Integrin-linked kinase                        | 6196       | -3.40    | 0.38        |
| Small nuclear ribonucleoprotein polypeptide A | 173255     | -3.39    | 0.46        |

ND = not defined; EST = expressed sequence tag; \* (Genebank ID provided where Unigene ID unavailable)

# Online Supplementary Figure - Bim expression during acute HBV infection

**A**

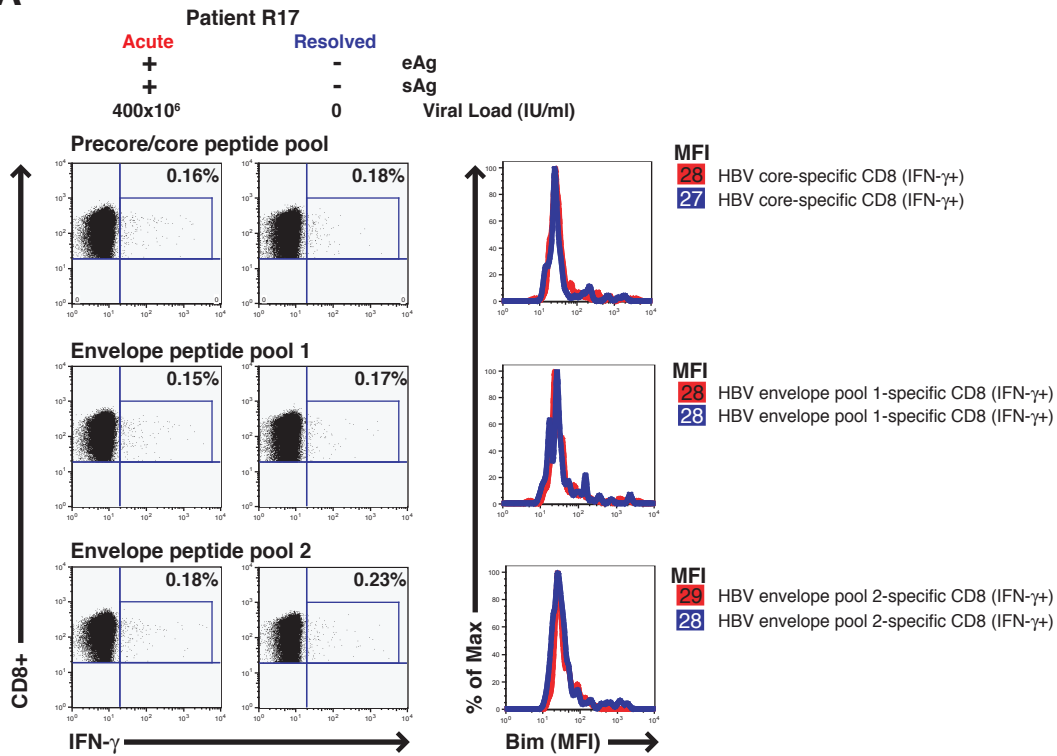

**B**

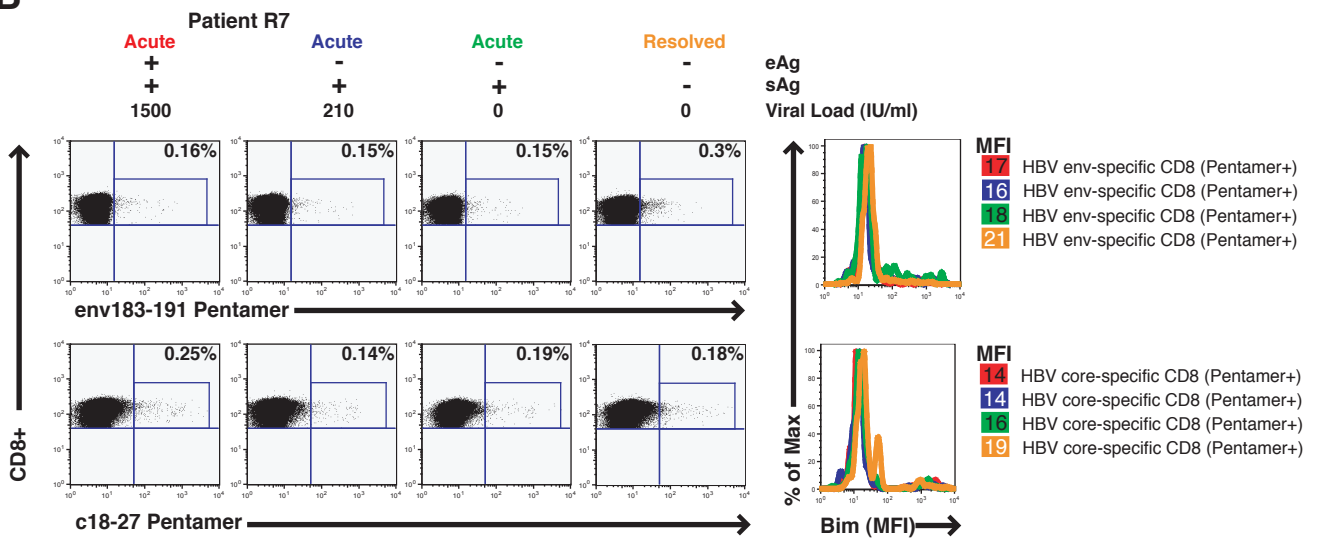

**C**

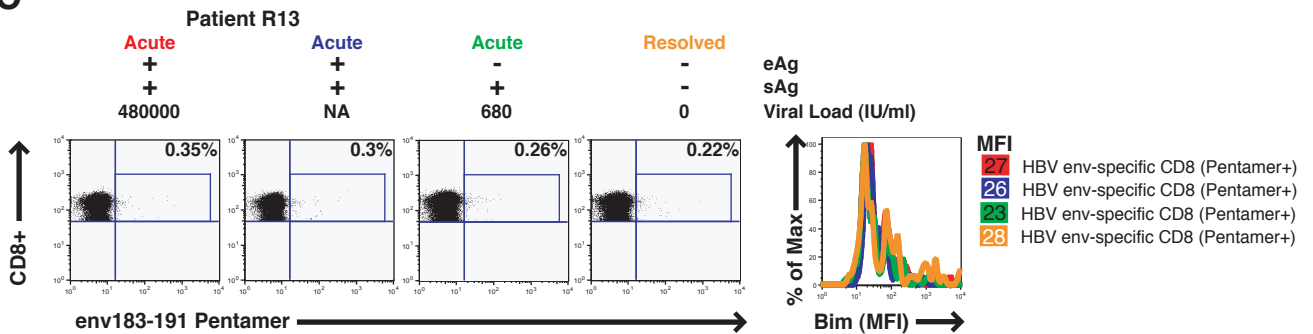

*Online Supplementary Figure: Bim expression during acute HBV infection.*

(A) FACS dot plots show identification of HBV-specific CD8 responses using pools of overlapping peptides for core and envelope in an HLA-A2 negative patient with acute symptomatic HBV infection (R17, see online patient table I). Above the dot plots are the evolution of serology and viral load from acute to resolution phases of the infection, and the right panel shows the overlay of the MFI for Bim expression within the HBV-specific CD8 for the different time points. (B) As for (A) but for an HLA-A2+ patient (R7) sampled through the course of acute HBV infection using HLA-A2/core18-27 and env183-91 tetramers. (C) As for (A) for an HLA-A2+ patient (R13) sampled through the course of acute HBV infection using the HLA-A2/env183-91 tetramers.
